# Supplementary material
Source: publisher figshare collection journal article supplement (https://gsapubs.figshare.com/ndownloader/files/22745987)

DR2004166

Koeberl, Farley, Peucker-Ehrenbrink, and Septhon

Tables and Figures for electronic repository

Table 1. Iridium contents of P-Tr samples

|                     |          |
|---------------------|----------|
| <u>Val Badia</u>    | Ir (ppt) |
| S0                  | 242 ± 30 |
| SU 0-4              | 30 ± 11  |
| SU 164              | 65 ± 16  |
| SD 55               | 21 ± 9   |
| SD 105              | 105 ± 21 |
| <u>Gartnerkofel</u> |          |
| #116                | 133 ± 23 |
| #116a               | 145 ± 12 |
| #117S               | 216 ± 32 |
| #118                | 109 ± 16 |
| #118a               | 87 ± 15  |
| #118S               | 97 ± 19  |
| #119                | 155 ± 24 |
| #119a               | 110 ± 21 |
| #195                | 65 ± 16  |
| #197                | 75 ± 13  |

Note: see Figs. 3 and 4 for sample placement.

Table 2. Abundances of Re, Os, Ir, Ru, Pd, and Pt, as well as measured and initial  $^{187}\text{Os}/^{188}\text{Os}$  in selected samples from the Gartnerkofel and Val Badia P/Tr boundary sections. Initial ratios were calculated with a decay constant of  $1.666 \cdot 10^{-11} \text{ yr}^{-1}$  (Smoliar et al., 1996) and an age of 251 Myr.

| Sample       | Depth<br>(m) | $^{187}\text{Os}/^{188}\text{Os}$<br>measured | $^{187}\text{Os}/^{188}\text{Os}$<br>at 251Ma | Re<br>ng/g | Os<br>pg/g | Ir<br>pg/g | Ru<br>ng/g | Pt<br>ng/g | Pd<br>ng/g |
|--------------|--------------|-----------------------------------------------|-----------------------------------------------|------------|------------|------------|------------|------------|------------|
| Gartnerkofel |              |                                               |                                               |            |            |            |            |            |            |
| 116          | 185.51       | 2.171±0.019                                   | 0.445                                         | 1.27       | 19         | 6          | 15.4       | 0.8        |            |
| 117S         | 185.57       | 0.954±0.027                                   | Negative                                      | 33.57      | 175        | 205        | 61.1       | 36.1       | 0.71       |
| 119          | 185.96       | 0.935±0.010                                   | 0.581                                         | 0.34       | 22         | 6          | 11.9       | 0.03       |            |
| Val Badia    |              |                                               |                                               |            |            |            |            |            |            |
| SU0-4        |              | 21.51±0.16                                    | 5.25                                          | 18.18      | 86         |            | 3.7        |            |            |
| S 0          |              | 30.71±0.19                                    | 20.71                                         | 76.28      | 1470       | 6          | 3.8        | 0.27       |            |
| SD 55        |              | 19.09±0.20                                    | 8.69                                          | 3.08       | 21         |            | 6.0        |            |            |
| SD 105       |              | 4.94±0.04                                     | 4.33                                          | 6.04       | 324        |            | 114.6      | 0.23       |            |

Table 3. Helium isotope concentrations and ratios for the Gartnerkofel samples.

| Sample | Meters | $^3\text{He}$ (pcc/g) | $^4\text{He}$ (ncc/g) | $^3\text{He}/^4\text{He}$ ( $\times 10^{-8}$ ) |
|--------|--------|-----------------------|-----------------------|------------------------------------------------|
| 191    | 221.01 | 0.0095                | 765.38                | 1.24                                           |
| 193    | 222.2  | 0.1047                | 3985.54               | 2.63                                           |
| 194    | 222.35 | ND                    | 90.78                 | < 0.72                                         |
| 195    | 223.94 | 0.0026                | 49.48                 | 5.22                                           |
| 197    | 225.4  | 0.0040                | 339.58                | 1.19                                           |
| 198    | 226    | 0.0018                | 291.76                | 0.62                                           |
| 199    | 227.45 | 0.0012                | 183.93                | 0.63                                           |
| 202    | 229.65 | 0.0040                | 181.19                | 2.23                                           |
| 203    | 229.8  | 0.0125                | 723.41                | 1.73                                           |
| 206    | 231.25 | 0.0040                | 59.58                 | 6.79                                           |
| 207    | 231.37 | 0.0010                | 21.29                 | 4.89                                           |
| 209    | 233.08 | 0.0121                | 803.54                | 1.50                                           |
| 210    | 233.6  | 0.0035                | 90.03                 | 3.91                                           |
| 211    | 235.25 | 0.0038                | 82.50                 | 4.57                                           |
| 213    | 236.65 | 0.0026                | 113.57                | 2.29                                           |
| 214    | 236.76 | ND                    | 11.13                 | < 3.5                                          |
| 215    | 237.84 | ND                    | 81.92                 | <0.80                                          |
| 217    | 240.9  | ND                    | 23.91                 | <2.72                                          |

Method: Briefly, ~1 g of rock was pulverized and decarbonated in 10% acetic acid for several hours. The residue was centrifuged, rinsed in deionized water, re-centrifuged, and transferred quantitatively to a tin foil package. The package was then fused under vacuum in a double-walled resistance furnace. Evolved He was separated from other gases using a combination of chemical getters and cryogenic purification, and analyzed on a MAP 215-50 mass spectrometer. He furnace blanks averaged  $0.1 \times 10^{-9}$  cc STP of  $^4\text{He}$  and  $0.5 \times 10^{-15}$  cc STP of  $^3\text{He}$ . The  $^4\text{He}$  blank was never more than 1% of the observed signal from the sample, but in most cases the blank was a very large fraction (up to 10s of %) of the measured  $^3\text{He}$  signal. As a result, in all cases the  $^3\text{He}$  concentrations are highly uncertain. To provide a firm upper limit on the  $^3\text{He}$  and  $^3\text{He}/^4\text{He}$  ratios in these samples we have *not* made a blank correction.

Figure DR1. Paleogeographic reconstruction of setting of study area (see Sephton et al., 2002, for details).

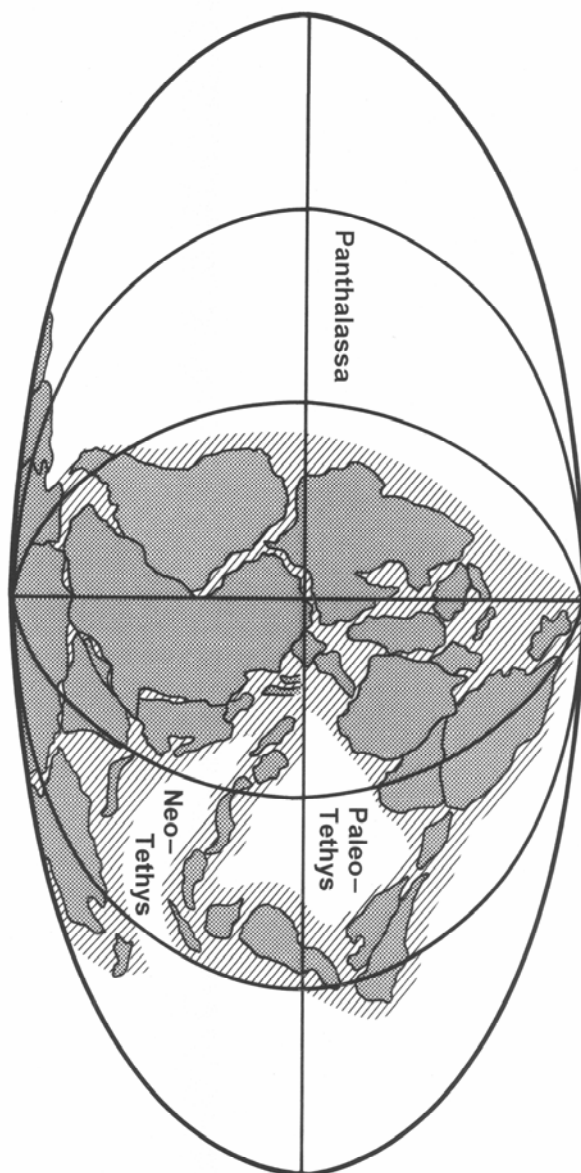

Fig. DR2 (A) Correlation between  $^4\text{He}$  content and the fraction of acid-insoluble residue in the sample. (B)  $^3\text{He}$  abundances as produced from natural neutron reactions on  $^6\text{Li}$ . See text for details.

**A**

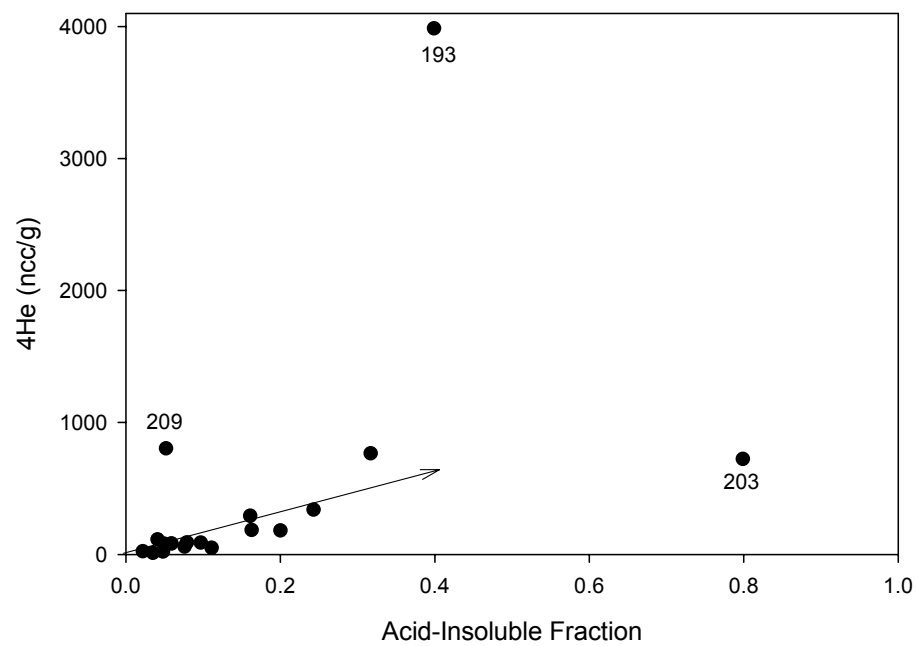

**B**

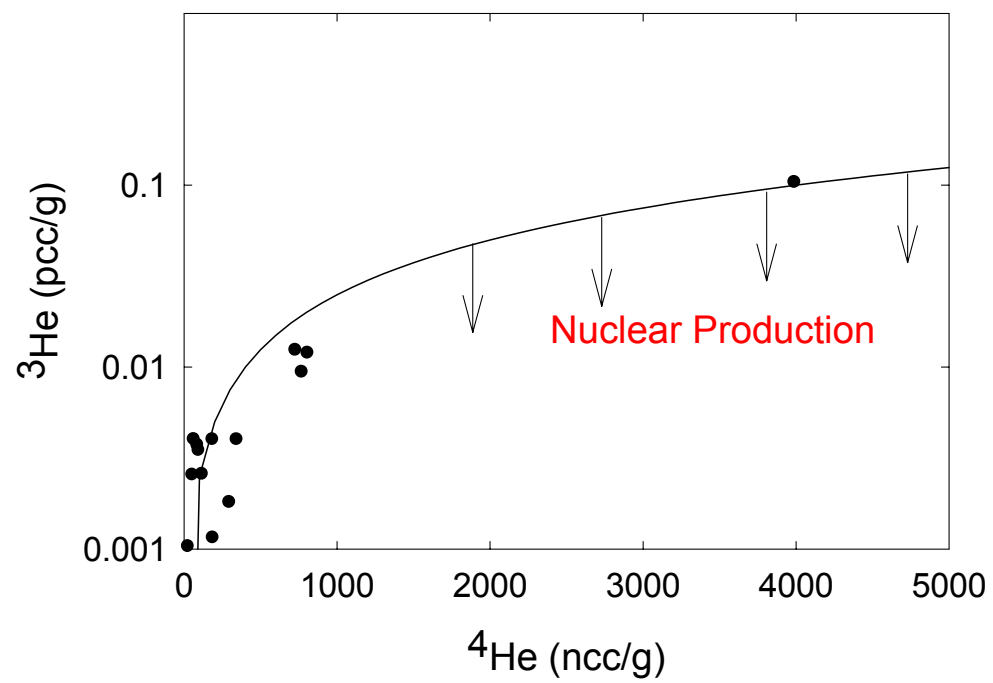

Supplement: Supplementary file 1 [file 22745987]
